# Supplementary material for: TBX3 Knockdown Decreases Reprogramming Efficiency of Human Cells
Source: Hindawi journal article supplement (doi:10.1155/2016/6759343), 2015-11-30
Supplement: f1 [file 6759343.f1.pdf]

**Supplementary Table S1:**

QuantiTect primer assays:

| <b>Gene</b>  | <b>Ordering Number</b> |
|--------------|------------------------|
| <i>AFP</i>   | QT00085183             |
| <i>FOXA2</i> | QT00212786             |
| <i>HMBS</i>  | QT00014462             |
| <i>MYH6</i>  | QT00030807             |
| <i>NANOG</i> | QT01025850             |
| <i>OCT4</i>  | QT00210840             |
| <i>PAX6</i>  | QT00071169             |
| <i>SOX2</i>  | QT00237601             |
| <i>T</i>     | QT00062314             |
| <i>TBX3</i>  | QT00022484             |
| <i>TUBB3</i> | QT00083713             |
